# Supplementary material for: The Clinical Efficacy and Safety of Stem Cell Therapy for Diabetes Mellitus: A Systematic Review and Meta-Analysis
Source: PubMed Central journal article supplement (PMC6961772; doi:10.14336/ad.2019.0421), 2020-02-01
Supplement: AD-11-1-141-s.pdf [file AD-11-1-141-s.pdf]

## SUPPLEMENTARY DATA

# **The Clinical Efficacy and Safety of Stem Cell Therapy for Diabetes Mellitus: A Systematic Review and Meta-Analysis**

**Yazhen Zhang<sup>1,2</sup>, Wenyi Chen<sup>1,2</sup>, Bing Feng<sup>1,2</sup>, Hongcui Cao<sup>1,2\*</sup>**

<sup>1</sup>State Key Laboratory for Diagnosis and Treatment of Infectious Diseases, the First Affiliated Hospital, College of Medicine, Zhejiang University, Hangzhou, China

<sup>2</sup>Collaborative Innovation Center for Diagnosis and Treatment of Infectious Diseases, Hangzhou, China

# SUPPLEMENTARY DATA

**Supplementary Table 1.** Search strategy.

| Data source                 | Search terms                                                                                                                                                                                                                                                                                                                                                                                                                           |
|-----------------------------|----------------------------------------------------------------------------------------------------------------------------------------------------------------------------------------------------------------------------------------------------------------------------------------------------------------------------------------------------------------------------------------------------------------------------------------|
| <b>PubMed</b>               | #1 stem cells [Title/Abstract]<br>#2 progenitor cells [Title/Abstract]<br>#3 hematopoietic stem cells [Title/Abstract]<br>#4 mesenchymal stem cells [Title/Abstract]<br>#5 bone marrow mononuclear cells [Title/Abstract]<br>#6 cell therapy [Title/Abstract]<br>#7 #1 OR #2 OR #3 OR #4 OR #5 OR #6<br>#8 diabetes [Title/Abstract]<br>#9 hyperglycemia [Title/Abstract]<br>#10 #8 OR #9<br>#11 #7 AND #10 filters: clinical trial    |
| <b>Embase</b>               | #1 'stem cells': ti, ab<br>#2 'progenitor cells': ti, ab<br>#3 'hematopoietic stem cell': ti, ab<br>#4 'mesenchymal stem cell': ti, ab<br>#5 'bone marrow derived stem cell': ti, ab<br>#6 'cell therapy': ti, ab<br>#7 #1 OR #2 OR #3 OR #4 OR #5 OR #6<br>#8 'diabetes': ti, ab<br>#9 'hyperglycemia': ti, ab<br>#10 #8 OR #9<br>#11 #7 AND #10<br>#12 #11 AND ('clinical trial'/de OR 'clinical trial (topic)'/de) AND 'article'/it |
| <b>The Cochrane Library</b> | #1 (diabetes):ti, ab, kw OR (hyperglycemia):ti, ab, kw (Word variations have been searched)<br>#2 (stem cells):ab OR (hematopoietic stem cells):ti, ab, kw OR (mesenchymal stem cells):ti, ab, kw OR (bone marrow mononuclear cells):ti, ab, kw AND (cell therapy):ti, ab, kw (Word variations have been searched)<br>#3 #2 AND #1 in Trials                                                                                           |
| <b>ClinicalTrials.gov</b>   | "diabetes" AND "stem cells"  studies with Results                                                                                                                                                                                                                                                                                                                                                                                      |

# SUPPLEMENTARY DATA

**Supplementary Table 2.** Results of the Downs and Black methodological quality assessment.

| Study           | Items |   |   |   |   |   |   |   |   |    |    |    |    |    |    |    |    |    |                |    |                |                |    |                |                |    |    | Total Score |
|-----------------|-------|---|---|---|---|---|---|---|---|----|----|----|----|----|----|----|----|----|----------------|----|----------------|----------------|----|----------------|----------------|----|----|-------------|
|                 | 1     | 2 | 3 | 4 | 5 | 6 | 7 | 8 | 9 | 10 | 11 | 12 | 13 | 14 | 15 | 16 | 17 | 18 | 19             | 20 | 21             | 22             | 23 | 24             | 25             | 26 | 27 |             |
| Ye 2017         | 1     | 1 | 1 | 1 | 1 | 1 | 1 | 0 | 1 | 0  | 0  | 1  | 1  | 0  | 0  | 1  | 1  | 1  | 0 <sup>a</sup> | 1  | 0 <sup>a</sup> | 0 <sup>a</sup> | 0  | 0              | 0 <sup>a</sup> | 1  | 5  | 20          |
| D'Addio 2014    | 1     | 1 | 1 | 1 | 1 | 1 | 0 | 1 | 1 | 0  | 0  | 1  | 1  | 0  | 0  | 1  | 1  | 1  | 0 <sup>a</sup> | 0  | 0              | 1              | 0  | 0              | 0 <sup>a</sup> | 1  | 5  | 20          |
| Zhang 2012      | 1     | 1 | 1 | 1 | 0 | 1 | 1 | 0 | 1 | 1  | 0  | 1  | 1  | 0  | 0  | 1  | 1  | 1  | 0 <sup>a</sup> | 1  | 1              | 1              | 0  | 0              | 0 <sup>a</sup> | 1  | 5  | 22          |
| Li 2012         | 1     | 1 | 1 | 1 | 1 | 1 | 1 | 1 | 1 | 1  | 0  | 1  | 1  | 0  | 0  | 1  | 1  | 1  | 0 <sup>a</sup> | 1  | 1              | 0              | 0  | 0              | 0 <sup>a</sup> | 1  | 5  | 23          |
| Gu 2012         | 1     | 1 | 1 | 1 | 1 | 1 | 1 | 1 | 1 | 0  | 0  | 1  | 1  | 0  | 0  | 1  | 1  | 1  | 0 <sup>a</sup> | 1  | 0              | 0              | 0  | 0              | 0 <sup>a</sup> | 1  | 5  | 21          |
| Snarski 2010    | 1     | 1 | 1 | 1 | 0 | 1 | 1 | 1 | 1 | 0  | 0  | 1  | 1  | 0  | 0  | 1  | 1  | 1  | 0 <sup>a</sup> | 1  | 0              | 1              | 0  | 0              | 0 <sup>a</sup> | 1  | 4  | 20          |
| Couri 2009      | 1     | 1 | 1 | 1 | 1 | 1 | 1 | 1 | 0 | 1  | 0  | 1  | 1  | 0  | 0  | 1  | 0  | 1  | 0 <sup>a</sup> | 1  | 1              | 0              | 0  | 0              | 0 <sup>a</sup> | 0  | 5  | 20          |
| Voltarelli 2007 | 1     | 1 | 1 | 1 | 1 | 1 | 1 | 1 | 0 | 1  | 0  | 1  | 1  | 0  | 0  | 1  | 0  | 1  | 0 <sup>a</sup> | 1  | 0              | 0              | 0  | 0              | 0 <sup>a</sup> | 1  | 5  | 20          |
| Carlsson 2014   | 1     | 1 | 1 | 1 | 1 | 1 | 1 | 1 | 0 | 0  | 0  | 1  | 1  | 0  | 0  | 1  | 1  | 1  | 0 <sup>a</sup> | 1  | 1              | 0 <sup>a</sup> | 1  | 0              | 0 <sup>a</sup> | 1  | 5  | 22          |
| Hu 2013         | 1     | 1 | 1 | 1 | 0 | 0 | 0 | 1 | 1 | 0  | 0  | 1  | 1  | 1  | 1  | 1  | 1  | 1  | 0 <sup>a</sup> | 0  | 0 <sup>a</sup> | 1              | 1  | 1              | 0 <sup>a</sup> | 1  | 5  | 22          |
| Bhansali 2017   | 1     | 1 | 1 | 1 | 1 | 1 | 1 | 1 | 1 | 1  | 0  | 1  | 1  | 1  | 0  | 1  | 1  | 1  | 0 <sup>a</sup> | 1  | 1              | 0 <sup>a</sup> | 1  | 0 <sup>a</sup> | 0 <sup>a</sup> | 1  | 5  | 25          |
| Hu 2016         | 1     | 1 | 1 | 1 | 1 | 1 | 0 | 1 | 1 | 0  | 0  | 1  | 1  | 0  | 0  | 1  | 1  | 1  | 0 <sup>a</sup> | 0  | 1              | 1              | 1  | 0              | 0 <sup>a</sup> | 1  | 5  | 22          |
| Skyler 2015     | 1     | 1 | 1 | 1 | 1 | 0 | 0 | 1 | 0 | 0  | 0  | 1  | 1  | 1  | 0  | 1  | 1  | 1  | 0 <sup>a</sup> | 0  | 1              | 0              | 1  | 0 <sup>a</sup> | 0 <sup>a</sup> | 1  | 5  | 20          |
| Guan 2015       | 1     | 1 | 1 | 1 | 1 | 1 | 1 | 1 | 1 | 0  | 0  | 1  | 1  | 0  | 0  | 1  | 1  | 1  | 0 <sup>a</sup> | 1  | 1              | 1              | 0  | 0              | 0 <sup>a</sup> | 1  | 3  | 21          |
| Liu 2014        | 1     | 1 | 1 | 1 | 1 | 0 | 1 | 1 | 1 | 0  | 0  | 1  | 1  | 0  | 0  | 1  | 1  | 1  | 0 <sup>a</sup> | 0  | 0 <sup>a</sup> | 1              | 0  | 0              | 0 <sup>a</sup> | 1  | 5  | 20          |
| Jiang 2011      | 1     | 1 | 1 | 1 | 1 | 1 | 1 | 1 | 1 | 0  | 0  | 1  | 1  | 0  | 0  | 1  | 1  | 1  | 0 <sup>a</sup> | 1  | 1              | 1              | 0  | 0              | 0 <sup>a</sup> | 1  | 5  | 23          |
| Bhansali 2017   | 1     | 1 | 1 | 1 | 1 | 1 | 1 | 1 | 1 | 1  | 0  | 1  | 1  | 0  | 0  | 1  | 1  | 1  | 0 <sup>a</sup> | 1  | 1              | 0 <sup>a</sup> | 0  | 0              | 0 <sup>a</sup> | 1  | 4  | 22          |
| Wu 2014         | 1     | 1 | 1 | 1 | 1 | 1 | 1 | 1 | 1 | 0  | 0  | 1  | 1  | 0  | 0  | 1  | 1  | 1  | 0 <sup>a</sup> | 1  | 0 <sup>a</sup> | 0 <sup>a</sup> | 1  | 0              | 0 <sup>a</sup> | 1  | 5  | 22          |
| Bhansali 2014   | 1     | 1 | 1 | 1 | 1 | 1 | 1 | 0 | 1 | 1  | 0  | 1  | 1  | 1  | 0  | 1  | 1  | 1  | 0 <sup>a</sup> | 1  | 1              | 1              | 1  | 0 <sup>a</sup> | 0 <sup>a</sup> | 1  | 5  | 25          |
| Hu 2012         | 1     | 1 | 1 | 1 | 1 | 0 | 1 | 1 | 1 | 1  | 0  | 1  | 1  | 0  | 0  | 1  | 1  | 1  | 0 <sup>a</sup> | 1  | 1              | 1              | 0  | 0              | 0 <sup>a</sup> | 1  | 5  | 23          |
| Bhansali 2009   | 1     | 1 | 1 | 1 | 1 | 1 | 1 | 1 | 1 | 1  | 0  | 1  | 1  | 0  | 0  | 1  | 1  | 1  | 0 <sup>a</sup> | 1  | 0 <sup>a</sup> | 1              | 0  | 0              | 0 <sup>a</sup> | 1  | 5  | 23          |

Abbreviations: Items 1–10: Reporting; Items 11–13: External validity; Items 14–20: Internal validity – bias; Items 21–26: Internal validity - confounding (selection bias); Items 27: Power.

0<sup>a</sup>: Item was unable to be determined, scored 0

## SUPPLEMENTARY DATA

**Supplementary Table 3A.** Results of sensitivity analysis of C-peptide levels in patients with T1DM after BM-HSC therapy.

| Study                                       | MD 95% CI                | p-value     | tau <sup>2</sup> | I <sup>2</sup> |
|---------------------------------------------|--------------------------|-------------|------------------|----------------|
| All studies included (random effects model) | 0.49 (0.24, 0.74)        | <0.001      | 0.06             | 93%            |
| <b>Omitting D'Addio 2014</b>                | <b>0.38 (0.21, 0.54)</b> | <b>0.16</b> | <b>0.01</b>      | <b>42%</b>     |
| Omitting Snarski 2010                       | 0.47 (0.20, 0.74)        | <0.001      | 0.07             | 95%            |
| Omitting Voltarelli 2007                    | 0.46 (0.17, 0.75)        | <0.001      | 0.07             | 95%            |
| Omitting Ye 2017                            | 0.53 (0.25, 0.81)        | <0.001      | 0.06             | 94%            |
| Omitting Zhang 2012                         | 0.56 (0.36, 0.76)        | 0.04        | 0.02             | 64%            |

**Supplementary Table 3B.** Results of sensitivity analysis of HbA1c levels in patients with T1DM after BM-HSC therapy.

| Study                                       | MD 95% CI                  | p-value     | tau <sup>2</sup> | I <sup>2</sup> |
|---------------------------------------------|----------------------------|-------------|------------------|----------------|
| All studies included (random effects model) | -4.11 (-5.11, -3.11)       | <0.001      | 0.79             | 88%            |
| <b>Omitting Couri 2009</b>                  | <b>4.54 (-5.38, -3.70)</b> | <b>0.10</b> | <b>0.32</b>      | <b>56%</b>     |
| Omitting D'Addio 2014                       | -4.32 (-6.22, -2.41)       | <0.001      | 2.38             | 88%            |
| Omitting Snarski 2010                       | -3.79 (-4.84, -2.74)       | <0.001      | 0.73             | 90%            |
| Omitting Ye 2017                            | -3.98 (-5.25, -2.70)       | <0.001      | 1.01             | 91%            |

**Supplementary Table 4A.** Results of sensitivity analysis of C-peptide levels in patients with T2DM after MSC therapy.

| Study                                       | MD 95% CI                 | p-value     | tau <sup>2</sup> | I <sup>2</sup> |
|---------------------------------------------|---------------------------|-------------|------------------|----------------|
| All studies included (random effects model) | 0.24 (-0.27, 0.76)        | 0.08        | 0.11             | 60%            |
| <b>Omitting Bhansali 2017</b>               | <b>0.59 (0.06, 1.13)</b>  | <b>0.58</b> | <b>0.00</b>      | <b>0%</b>      |
| Omitting Jiang 2011                         | 0.22 (-0.32, 0.76)        | 0.04        | 0.12             | 76%            |
| <b>Omitting Liu 2014</b>                    | <b>0.00 (-0.06, 0.07)</b> | <b>0.37</b> | <b>0.00</b>      | <b>0%</b>      |

## SUPPLEMENTARY DATA

**Supplementary Table 4B.** Results of sensitivity analysis of C-peptide levels in patient T2DM after BM-MNC therapy.

| Study                                       | MD 95% CI                | p-value     | tau <sup>2</sup> | I <sup>2</sup> |
|---------------------------------------------|--------------------------|-------------|------------------|----------------|
| All studies included (random effects model) | 0.36 (0.08, 0.64)        | <0.001      | 0.07             | 81%            |
| Omitting Bhansali 2009                      | 0.34 (-0.06, 0.73)       | 0.001       | 0.12             | 81%            |
| Omitting Bhansali 2014                      | 0.29 (0.02, 0.56)        | <0.001      | 0.06             | 82%            |
| <b>Omitting Bhansali 2017</b>               | <b>0.47 (0.28, 0.66)</b> | <b>0.12</b> | <b>0.02</b>      | <b>49%</b>     |
| Omitting Bhansali 2017                      | 0.41 (0.07, 0.74)        | <0.001      | 0.08             | 84%            |
| Omitting Wu 2014                            | 0.34 (-0.05, 0.73)       | <0.001      | 0.12             | 85%            |

**Supplementary Table 4C.** Results of sensitivity analysis of HbA1c levels in patients with T2DM after MSC therapy.

| Study                                       | MD 95% CI                   | p-value     | tau <sup>2</sup> | I <sup>2</sup> |
|---------------------------------------------|-----------------------------|-------------|------------------|----------------|
| All studies included (random effects model) | -1.54 (-2.48, -0.61)        | <0.001      | 0.72             | 85%            |
| <b>Omitting Bhansali 2017</b>               | <b>-1.89 (-2.70, -1.08)</b> | <b>0.06</b> | <b>0.31</b>      | <b>64%</b>     |
| Omitting Hu 2016                            | -1.37 (-2.49, -0.25)        | 0.005       | 0.75             | 81%            |
| Omitting Jiang 2011                         | -1.23 (-2.17, -0.29)        | <0.001      | 0.60             | 87%            |
| Omitting Liu 2014                           | -1.72 (-3.03, -0.40)        | <0.001      | 1.13             | 90%            |

**Supplementary Table 4D.** Results of sensitivity analysis of HbA1c levels in patients with T2DM after BM-MNC therapy.

| Study                                       | MD 95% CI            | p-value | tau <sup>2</sup> | I <sup>2</sup> |
|---------------------------------------------|----------------------|---------|------------------|----------------|
| All studies included (random effects model) | -0.51 (-1.13, 0.11)  | <0.001  | 0.53             | 90%            |
| Omitting Bhansali 2009                      | -0.39 (-1.12, 0.33)  | <0.001  | 0.62             | 92%            |
| Omitting Bhansali 2014                      | -0.65 (-1.28, -0.02) | <0.001  | 0.44             | 88%            |
| Omitting Bhansali 2017                      | -0.67 (-1.28, -0.06) | <0.001  | 0.41             | 88%            |
| Omitting Bhansali 2017                      | -0.60 (-1.28, 0.08)  | <0.001  | 0.54             | 91%            |
| Omitting Hu 2012                            | -0.34 (-0.97, 0.29)  | <0.001  | 0.43             | 84%            |
| Omitting Wu 2014                            | -0.38 (-1.14, 0.37)  | <0.001  | 0.66             | 92%            |

## SUPPLEMENTARY DATA

**Supplementary Table 4E.** Results of sensitivity analysis of FPG levels in patients with T2DM after MSC therapy.

| Study                                       | MD 95% CI                 | p-value     | tau <sup>2</sup> | I <sup>2</sup> |
|---------------------------------------------|---------------------------|-------------|------------------|----------------|
| All studies included (random effects model) | -0.49 (-2.60, 1.63)       | <0.001      | 3.29             | 96%            |
| Omitting Bhansali 2017                      | -1.29 (-2.92, 0.33)       | 0.03        | 1.10             | 79%            |
| <b>Omitting Hu 2016</b>                     | <b>0.44 (-0.74, 1.62)</b> | <b>0.08</b> | <b>0.52</b>      | <b>67%</b>     |
| Omitting Liu 2014                           | -0.55 (-3.41, 2.31)       | <0.001      | 4.18             | 98%            |

**Supplementary Table 4F.** Results of sensitivity analysis of FPG levels in patients with T2DM after BM-MNC therapy

| Study                                       | MD 95% CI           | p-value | tau <sup>2</sup> | I <sup>2</sup> |
|---------------------------------------------|---------------------|---------|------------------|----------------|
| All studies included (random effects model) | -0.53 (-1.53, 0.46) | <0.001  | 1.42             | 94%            |
| Omitting Bhansali 2009                      | -0.38 (-1.49, 0.73) | <0.001  | 1.51             | 95%            |
| Omitting Bhansali 2014                      | -0.75 (-1.87, 0.36) | <0.001  | 1.47             | 94%            |
| Omitting Bhansali 2017                      | -0.80 (-1.87, 0.26) | <0.001  | 1.34             | 93%            |
| Omitting Bhansali 2017                      | -0.69 (-1.89, 0.51) | <0.001  | 1.72             | 94%            |
| Omitting Hu 2012                            | -0.25 (-1.13, 0.62) | <0.001  | 0.84             | 87%            |
| Omitting Wu 2014                            | -0.31 (-1.41, 0.80) | <0.001  | 1.48             | 94%            |
